# Supplementary material for: Current Status of Baricitinib as a Repurposed Therapy for COVID-19
Source: MDPI journal article supplement (doi:10.3390/ph14070680), 2021-07-15
Supplement: s1 [file s1]

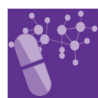**Table S1.** Main Neural networks used in drug design and repurposing.

| Neural Network                                    | Description                                                                                                                                                                                                                                                                                                                                                                                                                                                                                                  | Uses                                                                                                                                                                                                                                                                                 |
|---------------------------------------------------|--------------------------------------------------------------------------------------------------------------------------------------------------------------------------------------------------------------------------------------------------------------------------------------------------------------------------------------------------------------------------------------------------------------------------------------------------------------------------------------------------------------|--------------------------------------------------------------------------------------------------------------------------------------------------------------------------------------------------------------------------------------------------------------------------------------|
| Perceptron/<br>single-layer<br>neural<br>network. | <ul style="list-style-type: none"> <li>-The perceptron contains only two layers; input and output. There are no “hidden layers”.</li> <li>-Developed by Frank Rosenblatt [17].</li> </ul>                                                                                                                                                                                                                                                                                                                    |                                                                                                                                                                                                                                                                                      |
| Feed-forward<br>neural<br>network<br>(FFN)        | <ul style="list-style-type: none"> <li>-Simple input and output layers.</li> <li>-Nodes do not form a cycle.</li> <li>-Hidden layers have no connection to the outer world. -Each perceptron in one layer is connected with each node in the next layer.</li> <li>-All the nodes are fully connected.</li> <li>-There are no back-loops.</li> <li>-The error of prediction is minimum (Figure S1.A).</li> </ul>                                                                                              | FNNs are used in grouping drugs based on the transcriptomic profile [11].                                                                                                                                                                                                            |
| Deep<br>Convolutional<br>Network<br>(DCN)         | <ul style="list-style-type: none"> <li>-Neural networks used primarily for image recognition and grouping.</li> <li>-A Kernel is a filter used in convolutional layers to extract features.</li> <li>-creates unsupervised hierarchical image representations and add more complex features to it so that it can perform the task with better accuracy (Figure S1.B).</li> <li>-Limitations include slow computational speed and inability to consider the future input or to remember old state.</li> </ul> | Used for the analysis of chemical images to recognize drug action at the molecular level [13]. Extracted information by CNNs can predict the binding affinity of drugs to target proteins [12].                                                                                      |
| Recurrent<br>Neural<br>Network<br>(RNN)           | <ul style="list-style-type: none"> <li>-A modification to feed-forward (FF) networks (Quax and van Gerven, 2018).</li> <li>-Their architecture is temporal, with each neuron in hidden layers receives an input with a specific time lag (Figure S1.C).</li> <li>-Access previous information in current repetitions.</li> <li>Can process inputs and share any lengths and weights across time.</li> <li>-The computations in this model recognize/consider the previous information.</li> </ul>            | Used to generate libraries of molecules that can be then tested for a particular pharmacological action, and to predict drug-target interaction [14]. A hybrid model of CNN and RNN (molecular transformer drug target interaction- used to repurpose antivirals for COVID-19), [15] |

---

|                                      |                                                                                                                                                                                                   |                                                                                                                                      |
|--------------------------------------|---------------------------------------------------------------------------------------------------------------------------------------------------------------------------------------------------|--------------------------------------------------------------------------------------------------------------------------------------|
|                                      | -The model size does not increase with the size of the input.                                                                                                                                     |                                                                                                                                      |
|                                      | -Ensures proper integration of diverse data of disease, small molecules, existing drugs, and targeted proteins, with the possible prediction of new links between known and new disease entities. |                                                                                                                                      |
| Graph<br>Representatio<br>n Learning | Such similarities can lead to identifying drugs likely to be effective when repurposed.                                                                                                           | BenevolentAI's knowledge graph has been used to identify baricitinib as a potential treatment of COVID-19 [16], (refer to the text). |
|                                      | -The major limitation is scalability, as millions of entities in a medical knowledge graph could exist, surpassing the capacity of most existing machine learning systems.                        |                                                                                                                                      |

---

**Table S2.** Immune cells chemotaxis and migration-related functional clusters and pathways enriched in the downregulated transcriptome in baricitinib treated samples.

| Description                          | Term       | Log10 p-value | Log10 q-value | InTerm_InL | Genes                                                                                                                                                                                                                                                                                                                                                                                                                                                                                                                                                                                               |
|--------------------------------------|------------|---------------|---------------|------------|-----------------------------------------------------------------------------------------------------------------------------------------------------------------------------------------------------------------------------------------------------------------------------------------------------------------------------------------------------------------------------------------------------------------------------------------------------------------------------------------------------------------------------------------------------------------------------------------------------|
| chemokine-mediated signaling pathway | GO:0070098 | -8.90         | -6.25         | 20/88      | CCR1,CCR5,EDN1,FOXC1,GPR35,CXCL3,CXCL10,CXCL9,CCL1,CCL2,CCL3,CCL4,CCL5,CCL17,CCL20,CCL22,CCL24,CXCL11,CXCL1,CXCR6                                                                                                                                                                                                                                                                                                                                                                                                                                                                                   |
| neutrophil chemotaxis                | GO:0030593 | -8.65         | -6.04         | 21/100     | EDN1,EDN2,CXCL3,IL1B,CXCL10,CXCL9,RAC2,S100A8,CCL1,CCL2,CCL3,CCL4,CCL5,CCL17,CCL20,CCL22,CCL24,CXCL11,CXCL1,DAPK2,IL23A                                                                                                                                                                                                                                                                                                                                                                                                                                                                             |
| lymphocyte activation                | GO:0046649 | -8.12         | -5.58         | 69/748     | AIRE,BCL3,BST2,CASP3,CD3D,CD6,CD8A,CD8B,CD40,CTPS1,EPHB1,FANCD2,FGR,FYN,HELLS,HLA-A,IFNG,IL1B,IL2RA,IL4R,IL13,IDO1,INHBA,INHBA,IRF1,ITGAL,ITK,LCK,PDCD1,PLCG2,RAC2,RORA,CCL2,CCL5,XCL1,SHH,SLAMF1,SPN,UNG,NSD2,ZAP70,FZD5,FOXN1,TNFSF11,IL18R1,PGLYRP1,EXO1,IL27RA,SOX13,SOCS5,RNF41,IKZF3,PTPN22,ICOS,LEF1,IL23A,PAG1,SLAMF7,CLEC7A,RASAL3,VTCN1,PDCD1LG2,NFKBID,HAVCR2,PGLYRP2,SLAMF6,NLRC3,TXLNA,TBC1D10C,CTSC,IL13RA2,NECTIN2,CCL3,NR1D1,BMP7,HAS2,S100A8,TNF,SKAP1,ALOX15,KIF26B,ADAMTS18,PCDH8,B4GALNT2,EPHA1,ITGA3,ITGAV,NEDD9,RET,ADGRG1,DOCK5,TNC,MMP12,PLXNB1,PML,CYTIP,SLK,NUAK1,OCSTAMP |
| granulocyte chemotaxis               | GO:0071621 | -7.24         | -4.81         | 21/119     | EDN1,EDN2,CXCL3,IL1B,CXCL10,CXCL9,RAC2,S100A8,CCL1,CCL2,CCL3,CCL4,CCL5,CCL17,CCL20,CCL22,CCL24,CXCL11,CXCL1,DAPK2,IL23A                                                                                                                                                                                                                                                                                                                                                                                                                                                                             |
| leukocyte chemotaxis                 | GO:0030595 | -7.20         | -4.78         | 30/223     | CHGA,CCR1,CCR5,EDN1,EDN2,F7,FLT1,CXCL3,IL1B,CXCL10,CXCL9,PGF,RAC2,S100A8,CCL1,CCL2,CCL3,CCL4,CCL5,CCL17,CCL20,CCL22,CCL24,CXCL11,XCL1,PLA2G7,TNFSF11,CYP7B1,DAPK2,IL23A                                                                                                                                                                                                                                                                                                                                                                                                                             |
| chemotaxis                           | GO:0006935 | -7.17         | -4.75         | 60/649     | ALCAM,BMP7,CHGA,CCR1,CCR5,DEFB4A,EDN1,EDN2,EPHA1,EPHA4,EPHB1,F7,FLT1,FYN,CXCL3,NRG1,IL1B,CXCL10,ITGAV,CXCL9,PGF,PLXNB1,RAC2,RET,S100A8,CCL1,CCL2,CCL3,CCL4,CCL5,CCL17,CCL20,CCL22,CCL24,CXCL11,XCL1,SHH,SPN,CNTN2,PLA2G7,FOSL1,SEMA7A,TNFSF11,ALKBH1,ARTN,PDLIM7,CYP7B1,TUBB3,CXCR6,DAPK2,FLRT3,LEF1,IL23A,ENAH,VANG2,DSCAML1,SEMA6D,CMTM8,UNC5B,DEFB103A                                                                                                                                                                                                                                           |

|                                  |            |       |       |        |                                                                                                                                                                                                                                                                              |
|----------------------------------|------------|-------|-------|--------|------------------------------------------------------------------------------------------------------------------------------------------------------------------------------------------------------------------------------------------------------------------------------|
| T cell activation                | GO:0042110 | -7.07 | -4.68 | 48/472 | AIRE,BCL3,CASP3,CD3D,CD6,CD8A,CD8B,CTPS1,FANCD2,FYN,HLA-A,IFNG,IL1B,IL2RA,IL4R,IDO1,IRF1,ITGAL,ITK,LCK,PDCD1,RAC2,RORA,CCL2,CCL5,XCL1,SHH,SPN,ZAP70,FZD5,FOXN1,TNFSF11,IL18R1,SOX13,SOC55,PTPN22,ICOS,LEF1,IL23A,PAG1,CLEC7A,RASAL3,VTN1,PDCD1LG2,NFKBID,HAVCR2,SLAMF6,NLRC3 |
| lymphocyte migration             | GO:0072676 | -6.75 | -4.39 | 20/116 | AIRE,CXCL10,ITGAL,RET,CCL1,CCL2,CCL3,CCL4,CCL5,CCL17,CCL20,CCL22,CCL24,CXCL11,XCL1,SPN,ZAP70,ARTN,CYP7B1,IL27RA                                                                                                                                                              |
| monocyte chemotaxis              | GO:0002548 | -6.75 | -4.39 | 15/67  | CCR1,FLT1,CXCL10,CCL1,CCL2,CCL3,CCL4,CCL5,CCL17,CCL20,CCL22,CCL24,XCL1,PLA2G7,TNFSF11                                                                                                                                                                                        |
| cell chemotaxis                  | GO:0060326 | -6.58 | -4.25 | 35/304 | CHGA,CCR1,CCR5,DEFB4A,EDN1,EDN2,EPHB1,F7,FLT1,CXCL3,IL1B,CXCL10,CXCL9,PGF,RAC2,S100A8,CCL1,CCL2,CCL3,CCL4,CCL5,CCL17,CCL20,CCL22,CCL24,CXCL11,XCL1,PLA2G7,TNFSF11,CYP7B1,CXCR6,DAPK2,LEF1,IL23A,DEFB103A                                                                     |
| Th17 cell differentiation        | hsa04659   | -.05  | -1.45 | 13/107 | CD3D,IFNG,IL1B,IL2RA,IL2RB,IL4R,LCK,NFKBIE,RORA,STAT1,ZAP70,IL27RA,IL23A                                                                                                                                                                                                     |
| Th1 and Th2 cell differentiation | hsa04658   | -2.61 | -1.13 | 11/92  | CD3D,IFNG,IL2RA,IL2RB,IL4R,IL13,LCK,NFKBIE,STAT1,STAT4,ZAP70                                                                                                                                                                                                                 |

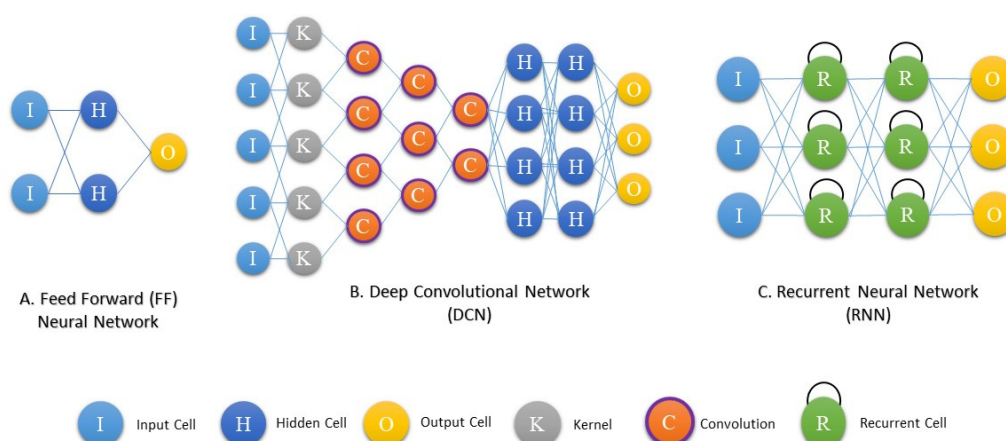

**Figure S1.** Types of common neural networks used in machine learning for drug discovery and repurposing. A. Feed Forward (FF) Neural Network. B. Deep Convolutional Network (DCN). C. Recurrent Neural Network (RNN).

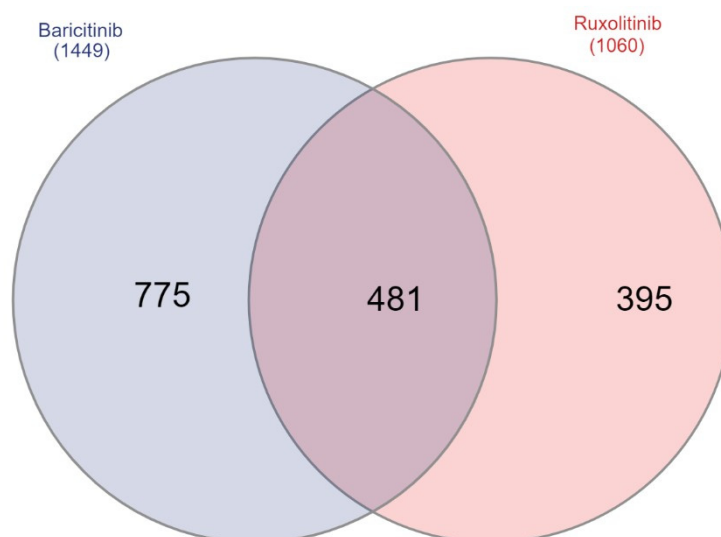

**Figure S2.** 481 genes were commonly suppressed by baricitinib and ruxolitinib in the C3H/HeJ grafted mouse model of alopecia areata.

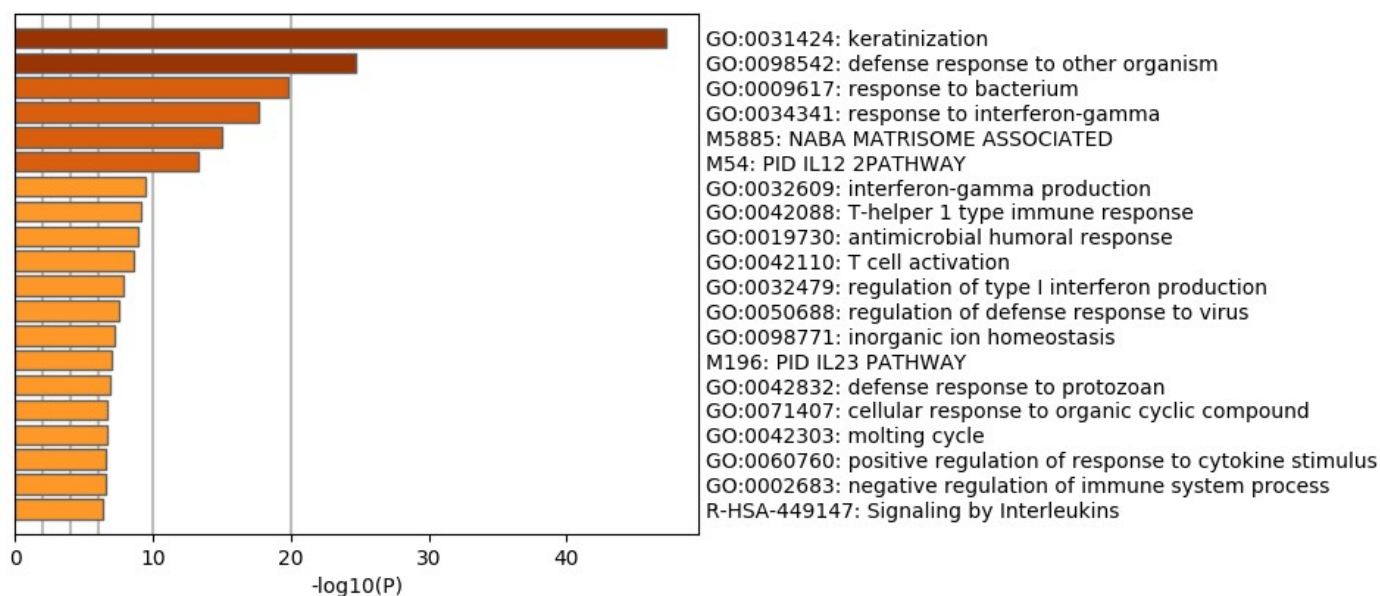

**Figure S3.** The commonly suppressed transcriptome was enriched in the following functional clusters and pathways: analysed using Metascape, (Zhou et al., 2019).
